# Supplementary material for: Immigrant community integration in world cities
Source: PubMed Central journal article supplement (PMC5851540; doi:10.1371/journal.pone.0191612), 2018-03-14
Supplement: pone.0191612.s001.pdf [file pone.0191612.s001.pdf]

# Supporting Information for *Immigrant community integration in world cities*

Fabio Lamanna,<sup>1</sup> Maxime Lenormand,<sup>2</sup> María Henar Salas-Olmedo,<sup>3</sup>  
Gustavo Romanillos,<sup>3</sup> Bruno Gonçalves,<sup>4</sup> and José J. Ramasco<sup>1, \*</sup>

<sup>1</sup>*Instituto de Física Interdisciplinar y Sistemas Complejos IFISC (CSIC-UIB),  
Campus UIB, 07122 Palma de Mallorca, Spain*

<sup>2</sup>*Irstea, UMR TETIS, 500 rue JF Breton, 34093 Montpellier, France*

<sup>3</sup>*Departamento de Geografía Humana, Facultad de Geografía e Historia,  
Universidad Complutense de Madrid, 28040, Madrid, Spain*

<sup>4</sup>*Center for Data Science, New York University, New York, 10011 NY, USA*

## Supporting Figures

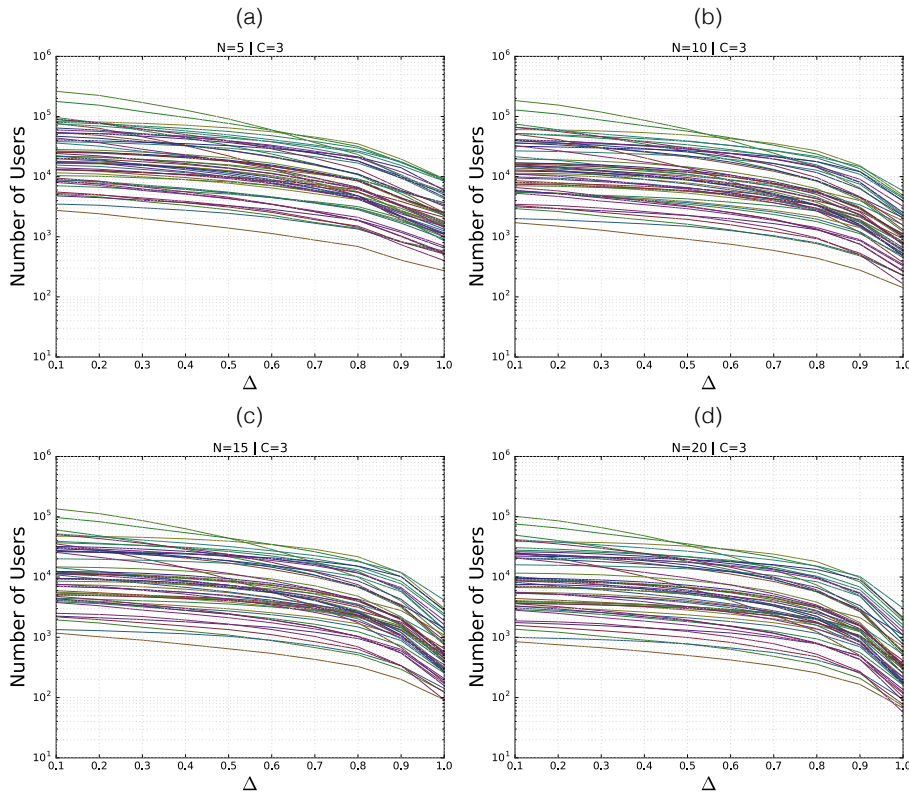

**Fig A. Number of reliable users as a function of  $N$  and  $\Delta$ .** Each line represents the trend of each city in the number of users according to the ratio between  $N$  and the total number of hours of activity for each user ( $\Delta$ ). Set as  $C=3$  the number of months for consecutive activities, (a) refers to  $N=5$ , (b) to  $N=10$ , (c) to  $N=15$  and (d) to  $N=20$ .

\*Corresponding author: jramasco@ifisc.uib-csic.es

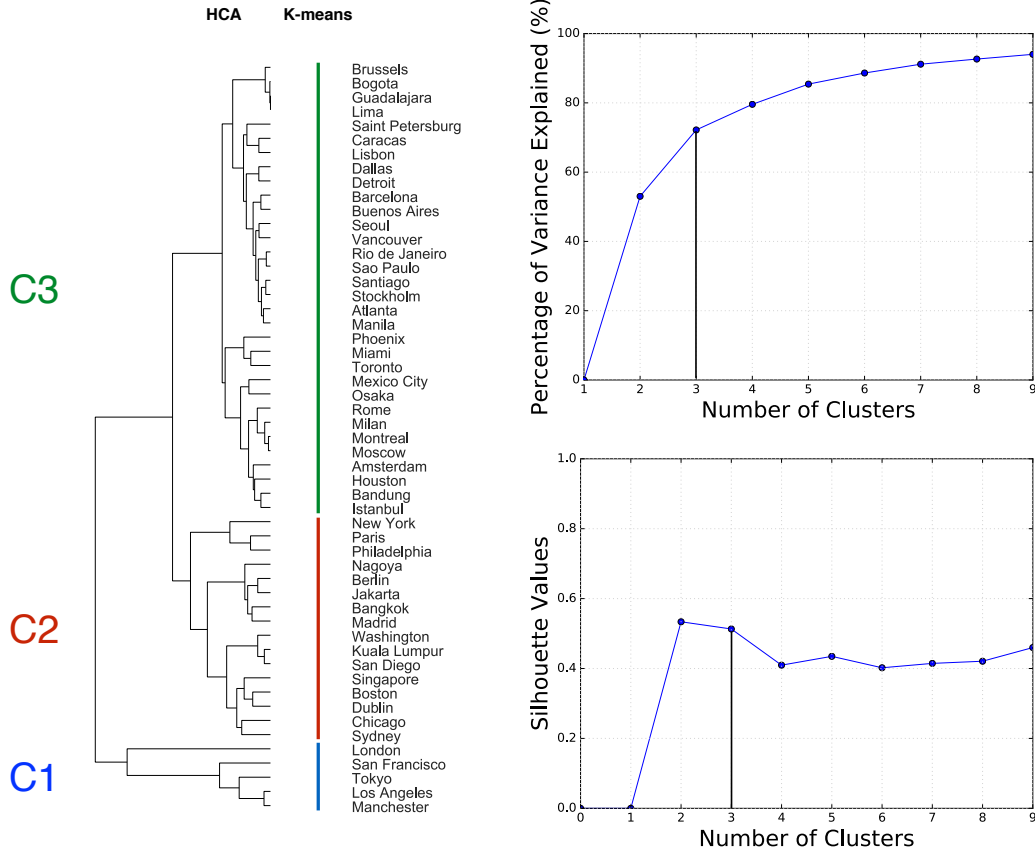

**Fig B.** Comparison of a k-means and hierarchical clustering algorithms over the vectors of the Bipartite Spatial Integration Network. C1, C2 and C3 are the clusters obtained through both algorithms, choosing as 3 the initial number of clusters to assign to the k-means analysis.

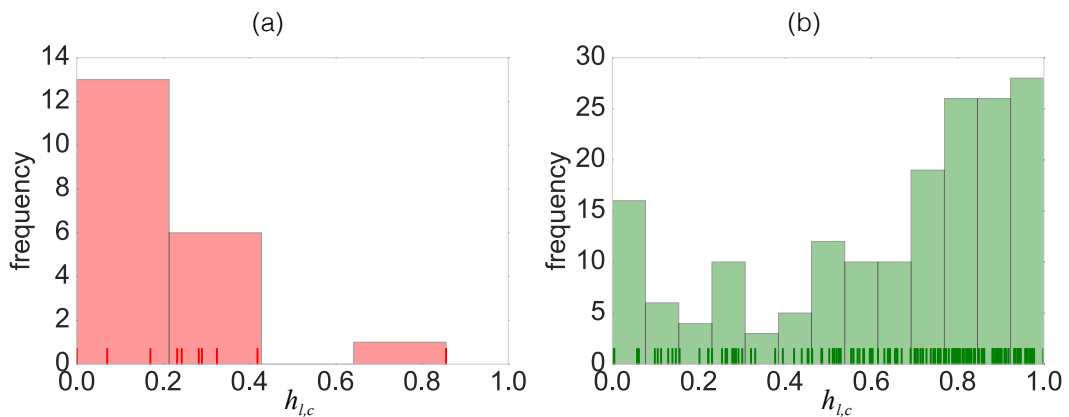

**Fig C.** Distribution of degree and weights in  $H$  with and without English. Distribution of weights for the full network (a) and in the network obtained removing English from the nodes of the Bipartite Spatial Integration Network (b). As shown, English is dominant in the worst links in terms of spatial integration.

## Supporting Tables

| City         | tweets   | users   | City             | tweets   | users  |
|--------------|----------|---------|------------------|----------|--------|
| Amsterdam    | 2082040  | 175107  | Mexico City      | 4458228  | 322462 |
| Atlanta      | 4896616  | 250803  | Miami            | 3716735  | 241676 |
| Bandung      | 7980207  | 487209  | Milan            | 1493614  | 103383 |
| Bangkok      | 9389888  | 265672  | Montreal         | 631844   | 52851  |
| Barcelona    | 2249807  | 168189  | Moscow           | 2805144  | 141589 |
| Berlin       | 703551   | 64360   | Nagoya           | 3941030  | 162606 |
| Bogota       | 3370596  | 195830  | New York         | 12960258 | 734100 |
| Boston       | 3500542  | 206385  | Osaka            | 10607046 | 351628 |
| Brussels     | 1434065  | 84140   | Paris            | 10929091 | 335553 |
| Buenos Aires | 18421250 | 459534  | Philadelphia     | 5841765  | 247875 |
| Caracas      | 1376503  | 108769  | Phoenix          | 2970897  | 136501 |
| Chicagos     | 5008746  | 304844  | Rio de Janeiro   | 20907590 | 295565 |
| Dallas       | 6650105  | 253760  | Rome             | 1240080  | 96213  |
| Detroit      | 3885662  | 144775  | Saint Petersburg | 1124887  | 63828  |
| Jakarta      | 28304891 | 1260903 | San Diego        | 2267882  | 164061 |
| Dublin       | 1516170  | 89259   | San Francisco    | 4615005  | 284215 |
| Guadalajara  | 704530   | 62403   | Santiago         | 3022229  | 148786 |
| Houston      | 5337061  | 193876  | Sao Paulo        | 18744302 | 371032 |
| Istanbul     | 19438021 | 838347  | Seoul            | 1338750  | 118509 |
| Kuala Lumpur | 16730001 | 412560  | Singapore        | 7530611  | 292571 |
| Lima         | 1356562  | 94234   | Stockholm        | 784807   | 51729  |
| Lisbon       | 3341088  | 57201   | Sydney           | 1226072  | 80349  |
| London       | 11167058 | 698424  | Tokyo            | 15029229 | 644683 |
| Los Angeles  | 12458292 | 600476  | Toronto          | 2281968  | 150786 |
| Madrid       | 5605452  | 275857  | Vancouver        | 660837   | 58984  |
| Manchester   | 6940211  | 337083  | Washington       | 6515118  | 330808 |
| Manila       | 19453573 | 449308  |                  |          |        |

**Table A.** Number of tweets and users detected in each city after filtering out bots and multi-user accounts.

| City         | Latitude   | Longitude   | City             | Latitude   | Longitude   |
|--------------|------------|-------------|------------------|------------|-------------|
| Amsterdam    | 52.370216  | 4.895168    | Mexico City      | 19.42705   | -99.127571  |
| Atlanta      | 33.748995  | -84.387982  | Miami            | 25.788969  | -80.226439  |
| Bandung      | -6.914744  | 107.609811  | Milan            | 45.465454  | 9.186516    |
| Bangkok      | 13.727896  | 100.524123  | Montreal         | 45.50867   | -73.553992  |
| Barcelona    | 41.385064  | 2.173403    | Moscow           | 55.755826  | 37.6173     |
| Berlin       | 52.519171  | 13.406091   | Nagoya           | 35.181446  | 136.906398  |
| Bogota       | 4.598056   | -74.075833  | New York         | 40.714353  | -74.005973  |
| Boston       | 42.358431  | -71.059773  | Osaka            | 34.693738  | 135.502165  |
| Brussels     | 50.85034   | 4.35171     | Paris            | 48.856614  | 2.352222    |
| Buenos Aires | -34.603723 | -58.381593  | Philadelphia     | 39.952335  | -75.163789  |
| Caracas      | 10.491016  | -66.902061  | Phoenix          | 33.448377  | -112.074037 |
| Chicago      | 41.878114  | -87.629798  | Rio de Janeiro   | -22.903539 | -43.209587  |
| Dallas       | 32.78014   | -96.800451  | Rome             | 41.892916  | 12.48252    |
| Detroit      | 42.331427  | -83.045754  | Saint Petersburg | 59.93428   | 30.335099   |
| Jakarta      | -6.211544  | 106.845172  | San Diego        | 32.715329  | -117.157255 |
| Dublin       | 53.349805  | -6.26031    | San Francisco    | 37.774929  | -122.419416 |
| Guadalajara  | 20.67359   | -103.343803 | Santiago         | -33.46912  | -70.641997  |
| Houston      | 29.760193  | -95.36939   | Sao Paulo        | -23.548943 | -46.638818  |
| Istanbul     | 41.00527   | 28.97696    | Seoul            | 37.566535  | 126.977969  |
| Kuala Lumpur | 3.139003   | 101.686855  | Singapore        | 1.352083   | 103.819836  |
| Lima         | -12.047816 | -77.062203  | Stockholm        | 59.32893   | 18.06491    |
| Lisbon       | 38.725299  | -9.150036   | Sydney           | -33.867487 | 151.20699   |
| London       | 51.511214  | -0.119824   | Tokyo            | 35.689487  | 139.691706  |
| Los Angeles  | 33.95      | -118.14     | Toronto          | 43.653226  | -79.383184  |
| Madrid       | 40.416775  | -3.70379    | Vancouver        | 49.261226  | -123.113927 |
| Manchester   | 53.479324  | -2.248485   | Washington       | 38.907231  | -77.036464  |
| Manila       | 14.599512  | 120.984219  |                  |            |             |

**Table B. Coordinates of the centers of the frame for each city.**

| City         | Resident Users | City             | Resident Users |
|--------------|----------------|------------------|----------------|
| Amsterdam    | 4986           | Mexico City      | 18079          |
| Atlanta      | 8474           | Miami            | 7754           |
| Bandung      | 27818          | Milan            | 4243           |
| Bangkok      | 25659          | Montreal         | 2613           |
| Barcelona    | 9957           | Moscow           | 9673           |
| Berlin       | 1301           | Nagoya           | 7589           |
| Bogota       | 19353          | New York         | 34325          |
| Boston       | 8989           | Osaka            | 16348          |
| Brussels     | 2325           | Paris            | 19757          |
| Buenos Aires | 48934          | Philadelphia     | 13679          |
| Caracas      | 4613           | Phoenix          | 9259           |
| Chicago      | 15397          | Rio de Janeiro   | 37177          |
| Dallas       | 15549          | Rome             | 1994           |
| Detroit      | 10652          | Saint Petersburg | 3819           |
| Jakarta      | 98997          | San Diego        | 5014           |
| Dublin       | 5480           | San Francisco    | 25504          |
| Guadalajara  | 3459           | Santiago         | 10066          |
| Houston      | 11413          | Sao Paulo        | 21862          |
| Istanbul     | 101556         | Seoul            | 3099           |
| Kuala Lumpur | 41084          | Singapore        | 20997          |
| Lima         | 2003           | Stockholm        | 2668           |
| Lisbon       | 4321           | Sydney           | 4751           |
| London       | 37402          | Tokyo            | 75929          |
| Los Angeles  | 70592          | Toronto          | 8737           |
| Madrid       | 15447          | Vancouver        | 2298           |
| Manchester   | 23836          | Washington       | 10147          |
| Manila       | 20093          |                  |                |

**Table C. Total number of residents users detected in the cities.**

| Detected language | Aggregated group          | Detected Language | Aggregated Group         |
|-------------------|---------------------------|-------------------|--------------------------|
| Albanian          | Albanian                  | Kurdish           | Kurdish                  |
| Arabic            | Arabic                    | Lettonian         | <b>Baltic</b>            |
| Belarusian        | <b>East Slavic</b>        | Lituanian         | <b>Baltic</b>            |
| Bosnian           | <b>South Slavic</b>       | Macedonian        | <b>South Slavic</b>      |
| Bulgarian         | <b>South Slavic</b>       | Malay             | Malay                    |
| Catalan           | Catalan                   | Norwegian         | <b>Northern European</b> |
| Chinese           | Chinese                   | Polish            | <b>West Slavic</b>       |
| Croatian          | <b>South Slavic</b>       | Portuguese        | Portuguese               |
| Czech             | <b>West Slavic</b>        | Romanian          | Romanian                 |
| Danish            | <b>Northern European</b>  | Russian           | <b>East Slavic</b>       |
| Dutch             | Dutch (including Flemish) | Serbian           | <b>South Slavic</b>      |
| English           | English                   | Serbo-Croatian    | <b>South Slavic</b>      |
| Faroese           | <b>Northern European</b>  | Slovak            | <b>West Slavic</b>       |
| Finnish           | Finnish                   | Slovenian         | <b>South Slavic</b>      |
| French            | French                    | Southern Sotho    | Southern Sotho           |
| German            | German                    | Spanish           | Spanish                  |
| Greek             | Greek                     | Swahili           | Swahili                  |
| Haitian           | Haitian                   | Swedish           | <b>Northern European</b> |
| Hungarian         | Hungarian                 | Sundanese         | Sundanese                |
| Icelandic         | <b>Northern European</b>  | Tagalog           | Tagalog                  |
| Indonesian        | Indonesian                | Thai              | Thai                     |
| Irish             | Irish                     | Turkish           | Turkish                  |
| Italian           | Italian                   | Ukrainian         | <b>East Slavic</b>       |
| Japanese          | Japanese                  | Vietnamese        | Vietnamese               |
| Javanese          | Javanese                  |                   |                          |
| Korean            | Korean                    |                   |                          |

**Table D. Language aggregation process.** A main Aggregated group has been associated to each language detected in the framework, to overlap "mutually intelligible" issues in the detection.

| City         | Local Culture   | City             | Local Culture               |
|--------------|-----------------|------------------|-----------------------------|
| Amsterdam    | Dutch           | Mexico City      | Spanish                     |
| Atlanta      | English         | Miami            | English                     |
| Bandung      | Indonesian      | Milan            | Italian                     |
| Bangkok      | Thai            | Montreal         | French/English              |
| Barcelona    | Spanish/Catalan | Moscow           | East-Slavic                 |
| Berlin       | German          | Nagoya           | Japanese                    |
| Bogota       | Spanish         | New York         | English                     |
| Boston       | English         | Osaka            | Japanese                    |
| Brussels     | French/Flemish  | Paris            | French                      |
| Buenos Aires | Spanish         | Philadelphia     | English                     |
| Caracas      | Spanish         | Phoenix          | English                     |
| Chicago      | English         | Rio de Janeiro   | Portuguese                  |
| Dallas       | English         | Rome             | Italian                     |
| Detroit      | English         | Saint Petersburg | East-Slavic                 |
| Jakarta      | Indonesian      | San Diego        | English                     |
| Dublin       | English/Irish   | San Francisco    | English                     |
| Guadalajara  | Spanish         | Santiago         | Spanish                     |
| Houston      | English         | Sao Paulo        | Portuguese                  |
| Istanbul     | Turkish         | Seoul            | Korean                      |
| Kuala Lumpur | Malay           | Singapore        | Malay/Chinese/English/Tamil |
| Lima         | Spanish         | Stockholm        | Northern-European           |
| Lisbon       | Portuguese      | Sydney           | English                     |
| London       | English         | Tokyo            | Japanese                    |
| Los Angeles  | English         | Toronto          | English                     |
| Madrid       | Spanish         | Vancouver        | English                     |
| Manchester   | English         | Washington       | English                     |
| Manila       | Tagalog         |                  |                             |

**Table E. Cities and local languages.** Each city has been associated to its main local language; Barcelona, Brussels, Dublin, Montreal and Singapore have been related to more than one language due to the coexistence of multiple languages in the same urban area.



| Cluster | City          | Q1   | Q2   | Q3   | IQR  | $P_c$ | Cluster | City             | Q1   | Q2   | Q3   | IQR  | $P_c$ |
|---------|---------------|------|------|------|------|-------|---------|------------------|------|------|------|------|-------|
| C1      | London        | 0.81 | 0.91 | 0.95 | 0.13 | 0.789 | C3      | Buenos Aires     | 0.23 | 0.51 | 0.80 | 0.57 | 0.029 |
| C1      | Manchester    | 0.91 | 0.95 | 0.96 | 0.06 | 0.543 | C3      | Caracas          | 0.25 | 0.50 | 0.75 | 0.50 | 0.022 |
| C1      | Los Angeles   | 0.87 | 0.93 | 0.96 | 0.09 | 0.518 | C3      | Dallas           | 0.19 | 0.34 | 0.40 | 0.20 | 0.071 |
| C1      | San Francisco | 0.77 | 0.83 | 0.92 | 0.15 | 0.522 | C3      | Detroit          | 0.19 | 0.39 | 0.45 | 0.26 | 0.064 |
| C1      | Tokyo         | 0.71 | 0.80 | 0.87 | 0.16 | 0.413 | C3      | Guadalajara      | 1.00 | 1.00 | 1.00 | 0.00 | 0.000 |
| C2      | Philadelphia  | 0.88 | 0.90 | 0.92 | 0.04 | 0.375 | C3      | Houston          | 0.51 | 0.57 | 0.63 | 0.12 | 0.087 |
| C2      | Paris         | 0.76 | 0.81 | 0.90 | 0.14 | 0.336 | C3      | Istanbul         | 0.16 | 0.57 | 0.69 | 0.52 | 0.071 |
| C2      | Singapore     | 0.81 | 0.86 | 0.95 | 0.15 | 0.319 | C3      | Lima             | 1.00 | 1.00 | 1.00 | 0.00 | 0.000 |
| C2      | New York      | 0.31 | 0.64 | 0.85 | 0.54 | 0.180 | C3      | Lisbon           | 0.16 | 0.32 | 0.66 | 0.50 | 0.014 |
| C2      | Kuala Lumpur  | 0.83 | 0.87 | 0.90 | 0.07 | 0.246 | C3      | Manila           | 0.11 | 0.22 | 0.53 | 0.41 | 0.023 |
| C2      | San Diego     | 0.82 | 0.88 | 0.93 | 0.12 | 0.236 | C3      | Mexico City      | 0.54 | 0.74 | 0.82 | 0.28 | 0.070 |
| C2      | Boston        | 0.65 | 0.80 | 0.88 | 0.23 | 0.241 | C3      | Miami            | 0.27 | 0.41 | 0.43 | 0.16 | 0.121 |
| C2      | Chicago       | 0.53 | 0.82 | 0.84 | 0.31 | 0.247 | C3      | Milan            | 0.57 | 0.76 | 0.78 | 0.21 | 0.103 |
| C2      | Dublin        | 0.57 | 0.79 | 0.87 | 0.29 | 0.220 | C3      | Montreal         | 0.61 | 0.69 | 0.72 | 0.11 | 0.107 |
| C2      | Sydney        | 0.27 | 0.65 | 0.75 | 0.48 | 0.161 | C3      | Moscow           | 0.66 | 0.72 | 0.76 | 0.10 | 0.113 |
| C2      | Washington    | 0.72 | 0.82 | 0.84 | 0.13 | 0.217 | C3      | Osaka            | 0.25 | 0.83 | 0.99 | 0.75 | 0.037 |
| C2      | Madrid        | 0.61 | 0.91 | 0.94 | 0.33 | 0.159 | C3      | Phoenix          | 0.41 | 0.47 | 0.56 | 0.15 | 0.105 |
| C2      | Nagoya        | 0.76 | 0.86 | 0.97 | 0.22 | 0.146 | C3      | Rio de Janeiro   | 0.33 | 0.47 | 0.63 | 0.29 | 0.044 |
| C2      | Bangkok       | 0.40 | 0.77 | 0.84 | 0.43 | 0.133 | C3      | Rome             | 0.78 | 0.79 | 0.88 | 0.10 | 0.124 |
| C2      | Berlin        | 0.44 | 0.77 | 0.90 | 0.46 | 0.108 | C3      | Saint Petersburg | 0.40 | 0.80 | 0.90 | 0.50 | 0.035 |
| C2      | Jakarta       | 0.42 | 0.63 | 0.82 | 0.40 | 0.099 | C3      | Santiago         | 0.21 | 0.38 | 0.61 | 0.40 | 0.030 |
| C3      | Amsterdam     | 0.30 | 0.52 | 0.74 | 0.44 | 0.063 | C3      | Sao Paulo        | 0.30 | 0.48 | 0.67 | 0.37 | 0.040 |
| C3      | Atlanta       | 0.10 | 0.21 | 0.41 | 0.31 | 0.026 | C3      | Seoul            | 0.28 | 0.29 | 0.60 | 0.32 | 0.034 |
| C3      | Bandung       | 0.36 | 0.66 | 0.77 | 0.41 | 0.068 | C3      | Stockholm        | 0.25 | 0.37 | 0.56 | 0.32 | 0.033 |
| C3      | Barcelona     | 0.36 | 0.60 | 0.80 | 0.44 | 0.044 | C3      | Toronto          | 0.10 | 0.33 | 0.47 | 0.37 | 0.117 |
| C3      | Bogota        | 0.25 | 0.50 | 0.75 | 0.50 | 0.011 | C3      | Vancouver        | 0.19 | 0.38 | 0.46 | 0.28 | 0.047 |
| C3      | Brussels      | 0.12 | 0.24 | 0.62 | 0.50 | 0.011 |         |                  |      |      |      |      |       |

**Table G. Power of Integration of Cities.**

| City         | Local Culture | City             | Local Culture |
|--------------|---------------|------------------|---------------|
| Amsterdam    | Netherlands   | Mexico City      | Mexico        |
| Atlanta      | USA           | Miami            | USA           |
| Bandung      | Indonesia     | Milan            | Italy         |
| Bangkok      | Thailand      | Montreal         | Canada        |
| Barcelona    | Spain         | Moscow           | Russia        |
| Berlin       | Germany       | Nagoya           | Japan         |
| Bogota       | Colombia      | New York         | USA           |
| Boston       | USA           | Osaka            | Japan         |
| Brussels     | Belgium       | Paris            | France        |
| Buenos Aires | Argentina     | Philadelphia     | USA           |
| Caracas      | Venezuela     | Phoenix          | USA           |
| Chicago      | USA           | Rio de Janeiro   | Brazil        |
| Dallas       | USA           | Rome             | Italy         |
| Detroit      | USA           | Saint Petersburg | Russia        |
| Jakarta      | Indonesia     | San Diego        | USA           |
| Dublin       | Ireland       | San Francisco    | USA           |
| Guadalajara  | Mexico        | Santiago         | Chile         |
| Houston      | USA           | Sao Paulo        | Brazil        |
| Istanbul     | Turkey        | Seoul            | Korea         |
| Kuala Lumpur | Malaysia      | Singapore        | Singapore     |
| Lima         | Per           | Stockholm        | Sweden        |
| Lisbon       | Portugal      | Sydney           | Australia     |
| London       | UK            | Tokyo            | Japan         |
| Los Angeles  | USA           | Toronto          | Canada        |
| Madrid       | Spain         | Vancouver        | Canada        |
| Manchester   | UK            | Washington       | USA           |
| Manila       | Philippines   |                  |               |

**Table H. City/Country Correspondence.**

### Evaluation of the migrant communities spatial distribution accuracy

Validation data was extracted from the Continuous Register Statistics of the Municipal Register, regarding the cities of Madrid and Barcelona. The smallest spatial units for this dataset are census tracks, of which the latest available geometrical boundaries for both study areas are the corresponding to 2013. It is well known that census tracks cover all the territory (not only populated areas) and that their size depends on the population density of an area, i.e. the more population density, the smallest the size and vice versa, in order to ensure that all census tracks have a similar number of inhabitants. This means that low density census tracks are larger than those corresponding to the city center, thus integrating non populated territory. For this reason, complementary data about the exact location of the residential areas is needed in order to properly geo-reference population data from census track statistics. In this research, information was extracted from the "Downloads of data and cartography by town" service of the SEC, the point of access to electronic services provided by the Directorate General of Land Registry of Spain. This data was transformed in order to obtain the surface devoted to each land use in each urban parcel. Some data treatment was required in order to obtain the number of people residing in each 500 x 500 m<sup>2</sup> grid cell according to the main language spoken in the country of origin. SI Table shows the correspondence between country of origin and the languages detected in the main part of this paper. It is important to notice that not all the countries in the world are present in the original table.

| Language     | Country of Origin                                                                                                       |
|--------------|-------------------------------------------------------------------------------------------------------------------------|
| German       | Germany                                                                                                                 |
| South Slavic | Bulgaria                                                                                                                |
| French       | France                                                                                                                  |
| Italian      | Italy                                                                                                                   |
| West Slavic  | Poland                                                                                                                  |
| Portuguese   | Portugal, Brazil                                                                                                        |
| English      | United Kingdom                                                                                                          |
| Romanian     | Romania                                                                                                                 |
| East Slavic  | Russia, Ukraine                                                                                                         |
| Arabic       | Morocco, Algeria                                                                                                        |
| Spanish      | Spain, Argentina, Bolivia<br>Colombia, Cuba, Chile, Ecuador<br>Paraguay, Peru, Dominican Republic<br>Uruguay, Venezuela |
| Chinese      | China                                                                                                                   |
| Urdu         | Pakistan                                                                                                                |

**Table I. Correspondence between languages detected in Twitter users and country of origin.**

The second step in data treatment was to locate where people in each census track actually live according with the location of residential land. We selected the blocks containing some surface devoted to residential use from the cadastral dataset. With the use of a Geographic Information System (GIS) we were able to intersect these polygons with the census track boundaries, and to assign the population of each census track to its residential land, proportional to the size of each residential polygon within each census track. Finally, the resulting dataset was intersected with the grid used in the previous parts of this research in order to obtain the estimated number of residents of each language in each grid cell.

Anselin Local Morans  $I$  is a well-known statistic that provides information on the location and size of four types of clusters: a) high-high clusters of significant high values of a variable that are surrounded by high variables of the same variable; b) high-low clusters of significant high values of a variable surrounded by low values of the same variable; c) low-high clusters of significant low values of a variable surrounded by high values of the same variable; and d) low-low clusters of significant low values of a variable surrounded by low values of the same variable. While the typical tools available in most GIS software solutions allow for univariate analysis, GeoDa is an open source product that also allows the computation of bivariate analysis [1], thus enabling the identification of spatial clusters in which high values of one variable are surrounded by high values of the second (i.e. lagged) variable (high-high clusters) and so on.

Bivariate global Morans  $I$  (SJ Table) indicates the existence of positive spatial autocorrelation between the location of tweets and residential areas. In general terms, there is a high positive spatial correlation in both study areas (Morans  $I = 0.6$ ). The  $z$  and  $p$  values have been evaluated through 99 permutations. This value remains high for local language (Spanish in Madrid and Spanish and Catalan in Barcelona). The spatial autocorrelation of foreign languages is a bit lower, which might be in part due to the inconsistencies between Twitter language and available countries of origin in the official statistics (i.e. United Kingdom is the only country of origin for English speakers and so are Morocco and Algeria for Arabic languages). Anyway, Arabic is the only language whose tweets show a random spatial pattern in relation with the location of resident population from Morocco or Algeria in both cities, whereas tweets in English in Barcelona and tweets in Portuguese in Madrid are highly



| Language    | City      | $I$  | Z-value | pseudo p-value | Spatial Autocorrelation |
|-------------|-----------|------|---------|----------------|-------------------------|
| Total       | Barcelona | 0,63 | 236,51  | 0,01           | Positive                |
|             | Madrid    | 0,62 | 268,62  | 0,01           | Positive                |
| Spanish     | Barcelona | 0,62 | 216,99  | 0,01           | Positive                |
|             | Madrid    | 0,62 | 267,29  | 0,01           | Positive                |
| English     | Barcelona | 0,50 | 230,53  | 0,01           | Positive                |
|             | Madrid    | 0,38 | 190,62  | 0,01           | Positive                |
| French      | Barcelona | 0,37 | 151,51  | 0,01           | Positive                |
|             | Madrid    | 0,32 | 159,25  | 0,01           | Positive                |
| Italian     | Barcelona | 0,28 | 125,84  | 0,01           | Positive                |
|             | Madrid    | 0,26 | 146,32  | 0,01           | Positive                |
| Portuguese  | Barcelona | 0,32 | 151,20  | 0,01           | Positive                |
|             | Madrid    | 0,44 | 204,95  | 0,01           | Positive                |
| Arabic      | Barcelona | 0,08 | 89,88   | 0,01           | Random                  |
|             | Madrid    | 0,07 | 41,50   | 0,01           | Random                  |
| East-Slavic | Barcelona | 0,21 | 112,83  | 0,01           | Positive                |
|             | Madrid    | 0,06 | 37,66   | 0,01           | Random                  |

**Table J. Data Validation.** Global Moran's  $I$ .

positively spatially correlated with resident population from the UK and Portugal or Brazil, respectively.

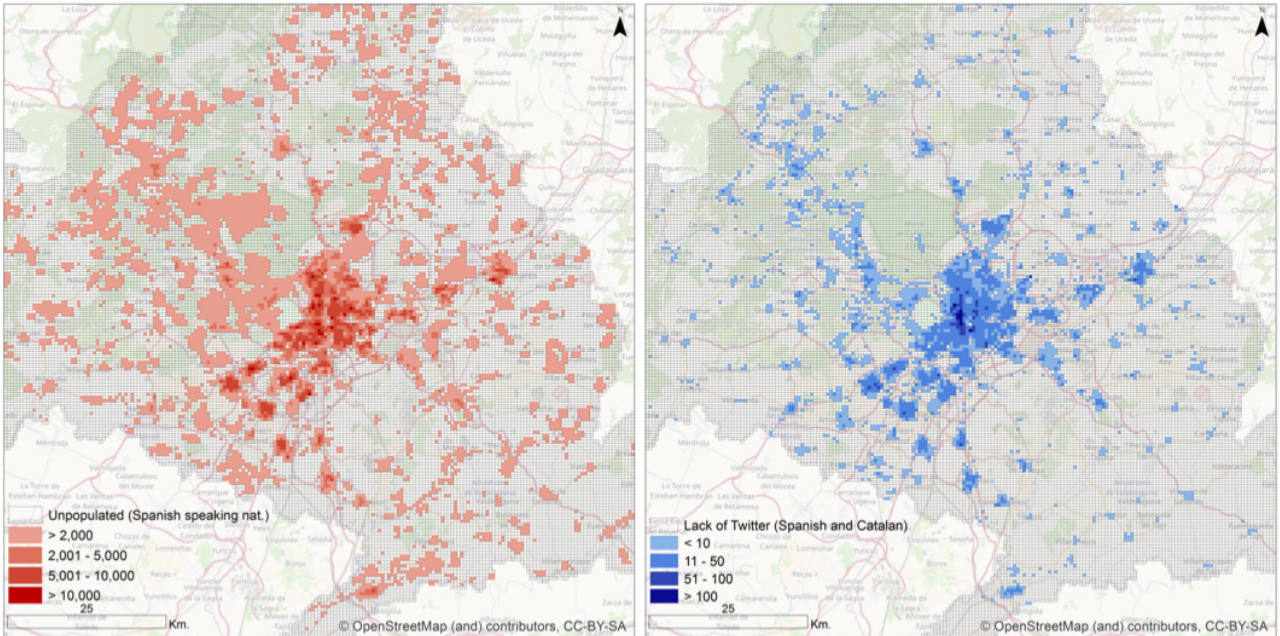

**Fig D. Data Validation (1/2).** Distribution of Spanish native users in Madrid, according to official statistics and to our framework of language detection process.

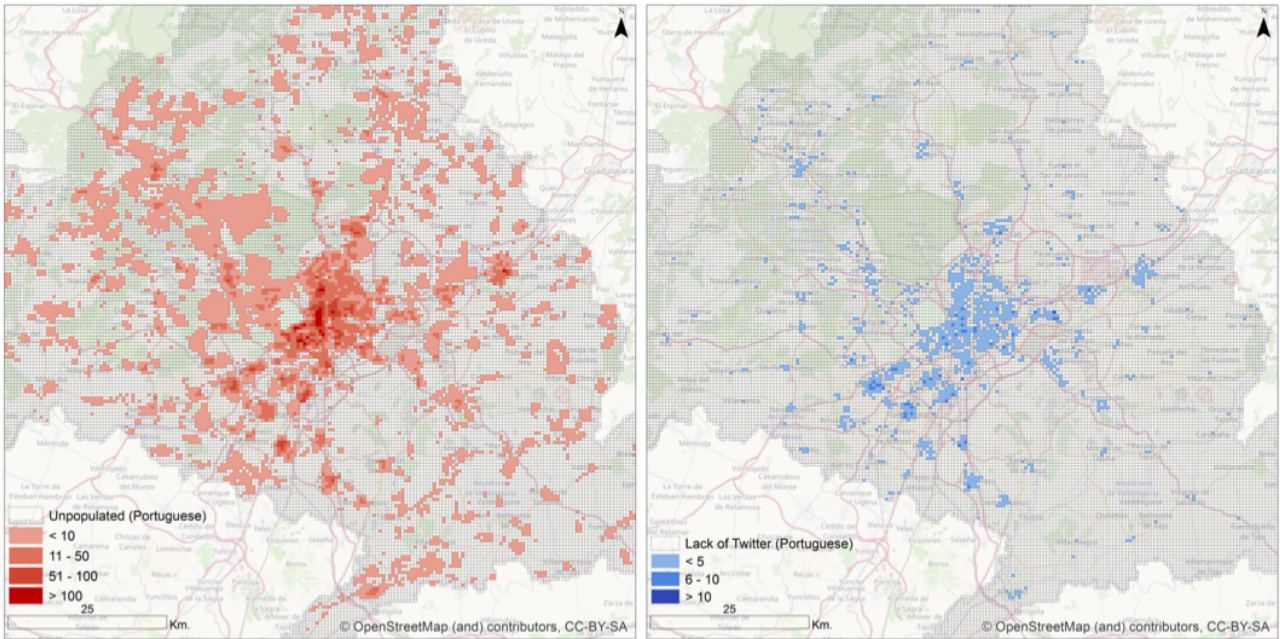

**Fig E. Data Validation (2/2).** Distribution of Portuguese native users in Madrid, according to official statistics and to our framework of language detection process.

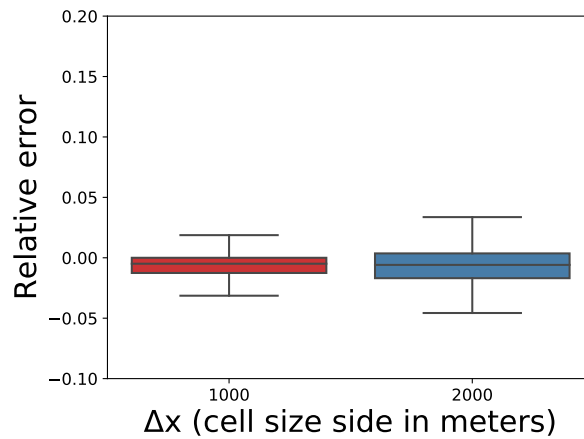

**Fig F. Relative error of the spatial entropy in function of  $\Delta x$ .** Box plots of the relative change  $\epsilon_{l,c}$  of the link weights in the bipartite spatial integration network taking as reference the unit-like  $\Delta x$  as the cell side frame of 500 meters, with respect of 4 and 16 times the  $\Delta x$  for cell side sizes of 1000 and 2000 meters, respectively.

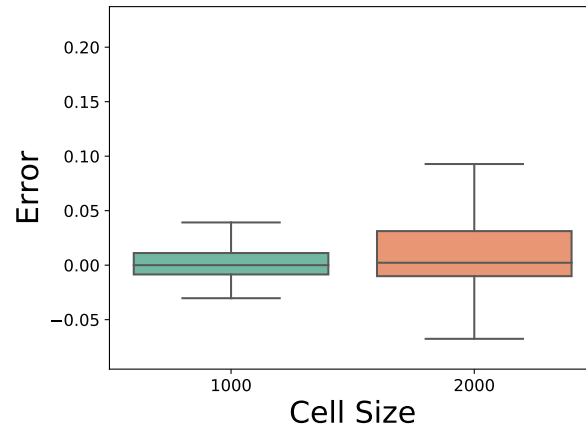

**Fig G. Relative error of link weights in function of the cell side size.** Box plots of the relative change  $\epsilon_{l,c}$  of the link weights in the bipartite spatial integration network taking as reference the 500 meters cell side frame.

### References

- [1] Anselin L, Syabri I, Kho Y. GeoDa: An introduction to spatial data analysis. *Geographical Analysis*. 2006;38(1):5-22. doi:10.1111/j.0016-7363.2005.00671.x.
